# Supplementary material for: Quantitative Principles of cis-translational control by general mRNA sequence features in eukaryotes
Source: bioRxiv or medRxiv preprint supplement (doi:10.1101/587584), 2019-04-04
Supplement: Supplementary file [file media-1.pdf]

## Contributions of sequence features to the variance in translation rates among endogenous mRNAs

| Sequence feature(s)                                                                                       | R <sup>2</sup> feature vs TR |
|-----------------------------------------------------------------------------------------------------------|------------------------------|
| <b><i>S. cerevisiae</i>, correlation to initiation rate modelled from RP data (Shah et al., 2013)</b>     |                              |
| -4 to + 37 folding energy                                                                                 | 0.02                         |
| CDS length                                                                                                | 0.35                         |
| <b><i>S. cerevisiae</i>, correlation to initiation rate modelled from RP data (Weinberg et al., 2016)</b> |                              |
| 5' most 70 nucleotides folding energy                                                                     | 0.14                         |
| CDS length                                                                                                | 0.24                         |
| 5' UTR folding energy, 5' UTR %GC, 5' UTR #uAUGs, 5'UTR length, CDS length                                | 0.39                         |
| <b><i>S. cerevisiae</i>, correlation to initiation rate modelled from RP data (Li et al., 2017)</b>       |                              |
| 5' UTR length                                                                                             | 0.05                         |
| 5' UTR #uORFs                                                                                             | 0.14                         |
| 5' UTR folding energy                                                                                     | 0.19                         |
| -35/+28 motif                                                                                             | 0.33                         |
| CDS length                                                                                                | 0.32                         |
| codon frequency                                                                                           | 0.60                         |
| all 5' UTR features, -35/+28 motif, CDS length                                                            | 0.58                         |
| all 5' UTR features, -35/+28 motif, CDS length, codon frequency                                           | 0.80                         |
| <b><i>mouse ES cell line</i> (Chew et al., 2016)</b>                                                      |                              |
| 5' UTR density of uAUGs                                                                                   | 0.04                         |
| 5' UTR length                                                                                             | 0.01                         |
| 5' UTR mean folding energy                                                                                | 0.01                         |
| -25 to +10 folding energy                                                                                 | 0.01                         |
| +1 to + 35 folding energy                                                                                 | 0.01                         |
| CDS mean folding energy                                                                                   | 0.06                         |
| -10 to +13 motif                                                                                          | 0.02                         |
| all above seven features                                                                                  | 0.14                         |
| <b><i>mouse liver</i> (Janich et al., 2015)</b>                                                           |                              |
| 5' UTR length                                                                                             | 0.05                         |
| CDS length                                                                                                | 0.16                         |
| 3' UTR length                                                                                             | 0.02                         |

\* R<sup>2</sup> coefficient of determination estimated as the square of a spearman rank correlation coefficient.

**Contributions of sequence features/motifs to the variance in translation rates across a set of heterologous mRNAs that have varying 5' UTRs fused upstream of a reporter CDS**

| Sequence feature(s)                                                                                               | R <sup>2</sup> feature vs TR |
|-------------------------------------------------------------------------------------------------------------------|------------------------------|
| <b><i>S. cerevisiae, in vitro, 18 natural 5' UTRs (Rojas-Duran and Gilbert, 2012)</i></b>                         |                              |
| 5' UTR length                                                                                                     | 0.18                         |
| 5' UTR folding energy                                                                                             | 0.25                         |
| <b><i>S. cerevisiae, in vivo, 141 random mutations in region -4 to +37 (Shah et al., 2013)</i></b>                |                              |
| -4 to +37 folding energy                                                                                          | 0.22                         |
| tRNA index                                                                                                        | 0.02                         |
| <b><i>S. cerevisiae, in vivo, 2,041 random mutations in region -10 to -1 (Dvir et al., 2013)</i></b>              |                              |
| -15 to +50 folding energy                                                                                         | 0.18                         |
| -10 to -1 uAUGs                                                                                                   | 0.06                         |
| -3 to -1 sequence motif                                                                                           | 0.29                         |
| -10 to -1 kmer frequency motif                                                                                    | 0.19                         |
| folding energy and sequence motifs (13 features)                                                                  | 0.68                         |
| <b><i>S. cerevisiae, in vivo, 383 random mutations in -14 to -1 or in the CDS (Ben-Yehzekel et al., 2015)</i></b> |                              |
| -14 to +39 mean folding energy                                                                                    | 0.12*                        |
| -7 to +33 folding energy                                                                                          | 0.20*                        |
| A at -3                                                                                                           | 0.12*                        |
| T at -3                                                                                                           | 0.12*                        |
| AUG context motif                                                                                                 | 0.21*                        |
| <b><i>S. cerevisiae, in vivo, 500,000 random mutations in region -50 to -1 (Cuperus et al., 2017)**</i></b>       |                              |
| -50 to -1 folding energy                                                                                          | 0.08                         |
| -50 to -1 >100 13 mer PWMs / Neural network model                                                                 | 0.47-0.62                    |
| <b><i>S. cerevisiae, in vivo, 11,856 50 nucleotide segments of natural 5' UTRs (Cuperus et al., 2017)**</i></b>   |                              |
| >100 13 mer PWMs / Neural network model trained on 500,000 random mutants                                         | 0.60                         |
| <b><i>H. sapiens, in vivo, 300,000 random mutations in region -50 to -1 (Sample et al., 2018)</i></b>             |                              |
| -50 to -1 folding energy                                                                                          | 0.19                         |
| -50 to -1 >100 8 mer PWMs / Neural network model                                                                  | 0.93                         |
| <b><i>H. sapiens, in vivo, sequences -50 to -1 for 35,212 natural 5' UTRs (Sample et al., 2018)</i></b>           |                              |
| -50 to -1 >100 8 mer PWMs / Neural network model                                                                  | 0.81                         |
| <b><i>H. sapiens, in vivo, 65,536 random mutations in region -6 to +5 (Noderer et al., 2014)</i></b>              |                              |
| PWM and di-nucleotide motif                                                                                       | 0.83                         |

\* R<sup>2</sup> coefficient of determination estimated as the square of a spearman rank correlation coefficient.

\*\* An indirect measure of translation based on competitive growth selection which could also capture effects on mRNA stability and transcription.

Ben-Yehzekel, T., Atar, S., Zur, H., Diamant, A., Goz, E., Marx, T., Cohen, R., Dana, A., Feldman, A., Shapiro, E., *et al.* (2015). Rationally designed, heterologous *S. cerevisiae* transcripts expose novel expression determinants. *RNA Biol* 12, 972-984.

Chew, G.L., Pauli, A., and Schier, A.F. (2016). Conservation of uORF repressiveness and sequence features in mouse, human and zebrafish. *Nat Commun* 7, 11663.

Cuperus, J.T., Groves, B., Kuchina, A., Rosenberg, A.B., Jojic, N., Fields, S., and Seelig, G. (2017). Deep learning of the regulatory grammar of yeast 5' untranslated regions from 500,000 random sequences. *Genome Res.* 27, 2015-2024.

- Dvir, S., Velten, L., Sharon, E., Zeevi, D., Carey, L.B., Weinberger, A., and Segal, E. (2013). Deciphering the rules by which 5'-UTR sequences affect protein expression in yeast. *Proc. Natl. Acad. Sci. USA* *110*, E2792-2801.
- Janich, P., Arpat, A.B., Castelo-Szekely, V., Lopes, M., and Gatfield, D. (2015). Ribosome profiling reveals the rhythmic liver translome and circadian clock regulation by upstream open reading frames. *Genome Res.* *25*, 1848-1859.
- Li, J.J., Chew, G.L., and Biggin, M.D. (2017). Quantitating translational control: mRNA abundance-dependent and independent contributions and the mRNA sequences that specify them. *Nucleic Acids Res.* *45*, 11821-11836.
- Noderer, W.L., Flockhart, R.J., Bhaduri, A., Diaz de Arce, A.J., Zhang, J., Khavari, P.A., and Wang, C.L. (2014). Quantitative analysis of mammalian translation initiation sites by FACS-seq. *Mol Syst Biol* *10*, 748.
- Rojas-Duran, M.F., and Gilbert, W.V. (2012). Alternative transcription start site selection leads to large differences in translation activity in yeast. *RNA* *18*, 2299-2305.
- Sample, P.J., Wang, B., Reid, D.W., Presnyak, V., McFadyen, I., Morris, D.R., and Seelig, G. (2018). Human 5' UTR design and variant effect prediction from a massively parallel translation assay. *BioRxiv*.
- Shah, P., Ding, Y., Niemczyk, M., Kudla, G., and Plotkin, J.B. (2013). Rate-limiting steps in yeast protein translation. *Cell* *153*, 1589-1601.
- Weinberg, D., Shah, P., Eichhorn, S., Hussmann, J., Plotkin, J., and Bartel, D. (2016). Improved ribosome-footprint and mRNA measurements provide insights into dynamics and regulation of yeast translation. *Cell Reports* *14*, 1787-1799.
